# Supplementary material for: Mechanisms of Venoarteriolar Reflex in Type 2 Diabetes with or without Peripheral Neuropathy
Source: MDPI journal article supplement (doi:10.3390/biology10040333), 2021-04-15
Supplement: s1 [file s1]

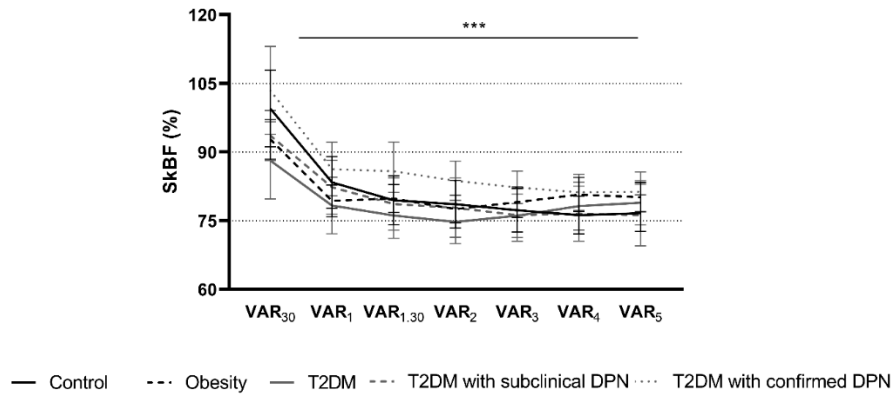

**Figure S1.** Skin blood perfusion kinetics during foot lowering at the dorsal foot in each group. \*\*\* Time effect  $p < 0.001$ ; Group effect:  $p = 0.09$ ; interaction:  $p = 1$ . DPN denotes diabetic peripheral neuropathy; T2DM, type 2 diabetes mellitus; SkBF, skin blood flow.

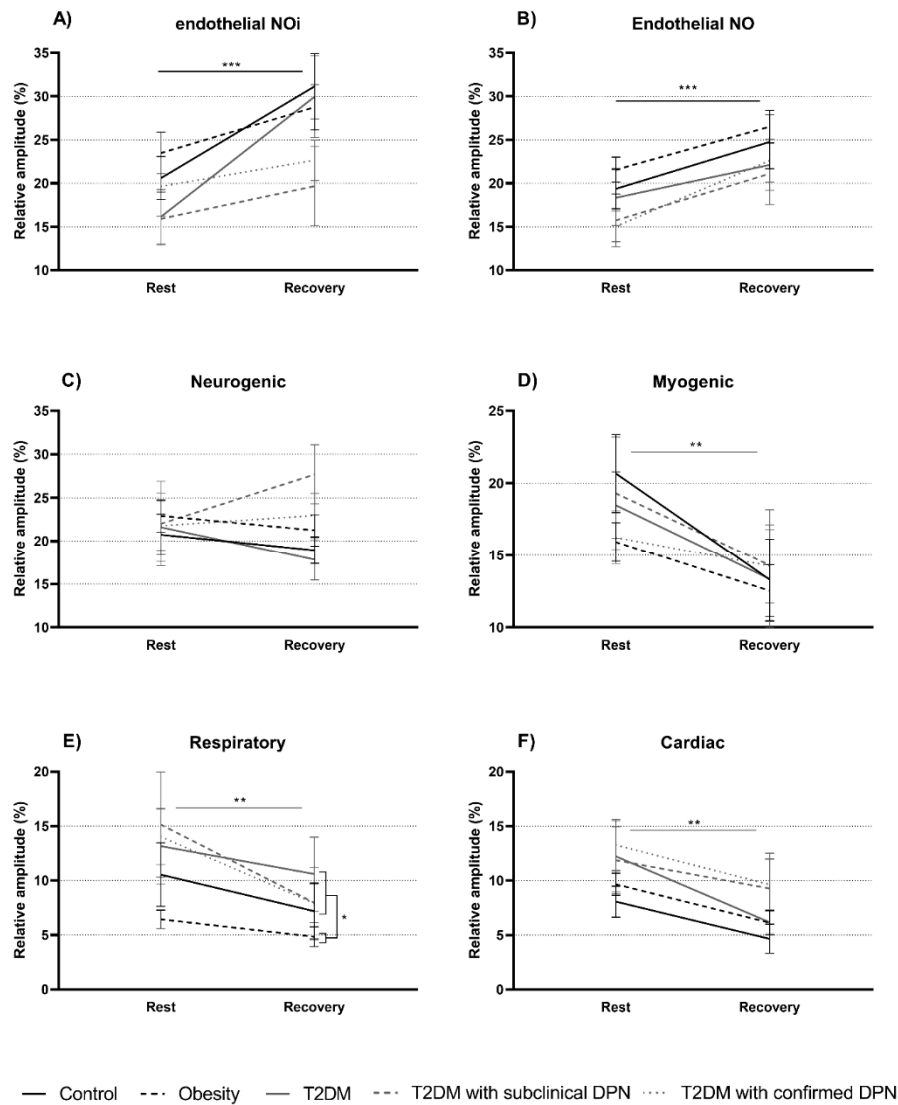

**Figure S2.** The relative contribution of each component at rest and during foot lowering at the dorsal foot : endothelial NO-independent (A), endothelial NO-dependent (B), neurogenic (C), myogenic (D), respiratory (E) and cardiac (F) band. \*\*\*Time effect  $p < 0.001$ ; \*\*Time effect  $p < 0.01$ ; \* Group effect T2DM vs Controls and Obesity  $p < 0.05$ . DPN, diabetic peripheral neuropathy; T2DM, type 2 diabetes mellitus.
